# Supplementary material for: Lipoprotein interactions with water-soluble NIR-II emitting aza-BODIPYs boost the fluorescence signal and favor selective tumor targeting
Source: Royal Society of Chemistry journal article supplement (doi:10.1039/d2bm01271e), 2022-01-01
Supplement: d2bm01271e1.pdf [file d2bm01271e1.pdf]

Supplementary Information

## Lipoprotein interactions with water-soluble NIR-II emitting aza-BODIPYs boost the fluorescence signal and favor selective tumor targeting

Ghadir Kalot<sup>1</sup>, Amélie Godard<sup>2</sup>, Benoit Busser<sup>1,3,4</sup>, Mohamed Bendellaa<sup>1</sup>, Fabien Dalonneau<sup>1</sup>, Catherine Paul<sup>5</sup>, Xavier Le Guével<sup>1</sup>, Véronique Josserand<sup>1,6</sup>, Jean Luc Coll<sup>1</sup>, Franck Denat<sup>2</sup>, Ewen Bodio<sup>2</sup>, Christine Goze<sup>2</sup>, Thomas Gautier<sup>7</sup>, Lucie Sancey<sup>1</sup>

<sup>1</sup> Université Grenoble Alpes, Institute for Advanced Biosciences, INSERM U 1209, CNRS UMR 5309, 38000 Grenoble, France.

<sup>2</sup> Institut de Chimie Moléculaire de l'Université de Bourgogne, Université Bourgogne Franche-Comté, CNRS UMR 6302, Dijon, France.

<sup>3</sup> Institut Universitaire de France (IUF), France.

<sup>4</sup> Grenoble Alpes University Hospital (CHUGA), Grenoble, France.

<sup>5</sup> Laboratoire d'Immunologie et Immunothérapie des Cancers, EPHE, PSL Research University, Université de Bourgogne, Dijon, France.

<sup>6</sup> OPTIMAL, Small animal Imaging Platform, 38000 Grenoble, France.

<sup>7</sup> INSERM UMR1231, UFR Sciences de santé, Université Bourgogne Franche-Comté, Dijon, France.

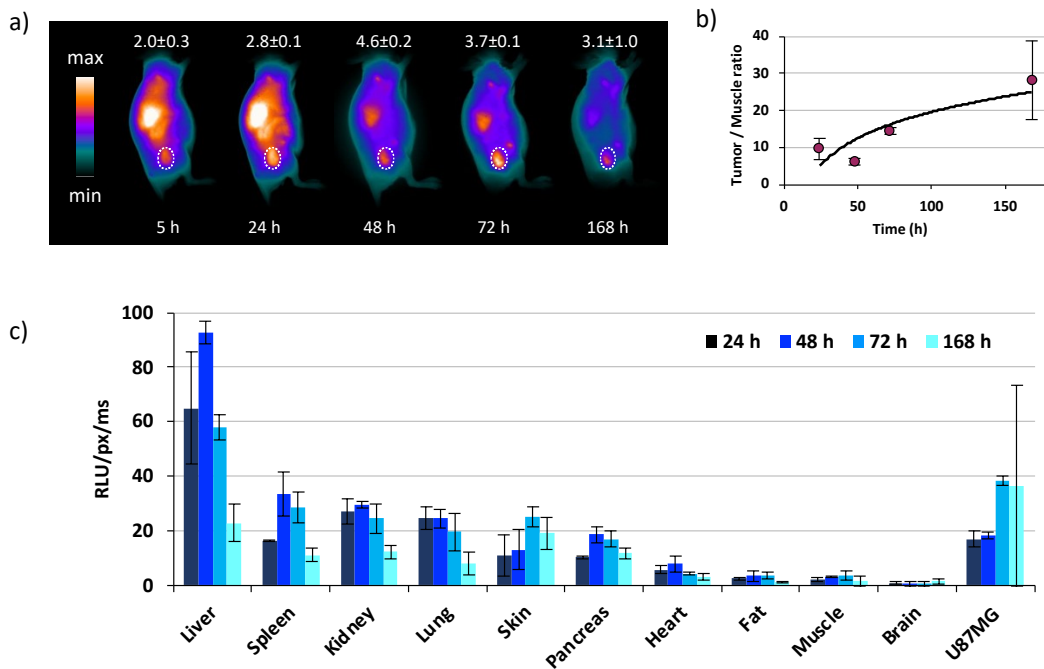

**Figure S1: SWIR-WAZABY-01 NIR-II tumor-uptake capacity.**

(a) NIR-II fluorescence imaging of a mouse bearing subcutaneous U-87 MG tumor, up to 7 days post SWIR-WAZABY-01 administration ( $n = 3$  / condition). Tumor/Skin ratios are indicated on the top of the pictures, as the mean of fluorescence intensities  $\pm$  standard deviation, for 3 animals. (b) Tumor/muscle ratios obtained from *ex-vivo* analyses respectively. (c) SWIR-WAZABY-01 biodistribution at different time points ( $n = 3$  / condition). (Adapted with permission from Kalot *et al. Bioconjugate Chem* 2020, copyright © 2020, American Chemical Society)

## Materials and Methods:

6 mice were implanted with U-87 MG cells orthotopically in their brain, according to the approved ethical guidelines and to the following procedure: anesthetized mice (isoflurane/air 4% for induction and 1.5% thereafter) were placed on a stereotaxic frame and 50  $\mu\text{L}$  of bupivacaine (5 mg/mL) were administered subcutaneously before scalp opening. The skull was revealed by gently removing the membranes (connective tissues) located on its external side. The point of needle injection was determined on the cranium surface (bregma 0, mediolateral 2 mm, dorso-ventral 3 mm), and a hole was drilled allowing the Hamilton syringe to be inserted (3 mm into the striatum). U-87 MG cells suspension ( $1.0 \times 10^5$  cells in 5  $\mu\text{L}$ ) was slowly pumped in (5  $\mu\text{L}/\text{min}$ ) using the needle, after which it was slowly removed (0.5 mm/30 sec). Finally, the opening was stoppered with Horsley wax and the skin was sutured. Following tumor growth, the mice were intravenously injected in their tail vein with 200  $\mu\text{L}$  of 600  $\mu\text{M}$  SWIR-WAZABY-01 solution diluted in PBS. *In vivo* NIR-II fluorescence imaging of the head was performed before and after SWIR-WAZABY-01 administration at 5, 24 and 48 h. Three mice were euthanized (at 24 and 48 h, respectively), and their brains were sampled for *ex-vivo* fluorescence imaging. Exposure time was optimized for each image acquisition. Acquired images were analyzed using Fiji software, and semi-quantitative fluorescence data were obtained by drawing regions of interest (ROI).

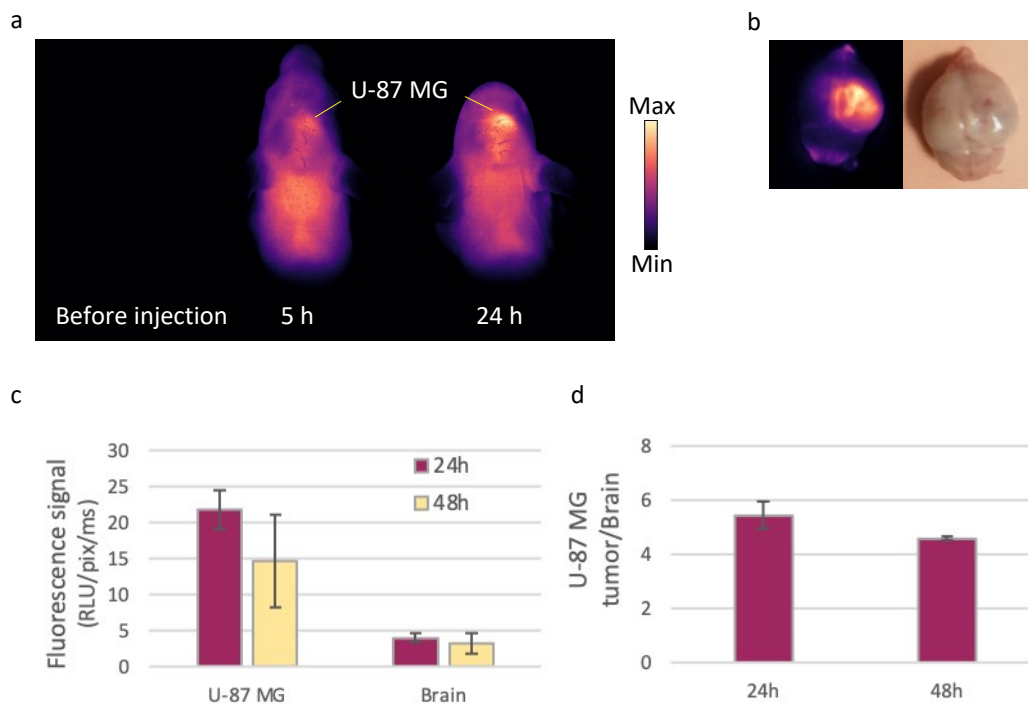

**Figure S2: SWIR-WAZABY-01 accumulation in U-87 MG intracranial orthotopic tumors.** (a) Example of in vivo NIR-II fluorescence imaging of mouse head, before, and 5 and 24 h post intravenous administration of SWIR-WAZABY-01 (200  $\mu\text{L}$  at 600  $\mu\text{M}$ ). The mouse brain bears a U-87 MG tumor in the right hemisphere. (b) Ex-vivo NIR-II fluorescence image and bright field image of the excised brain of (a). (c) Quantification of U-87 MG tumor and brain fluorescence signal obtained from the NIR-II fluorescence images of dissected brains collected at 24 and 48 h. (d) U-87 MG Tumor/Brain ratios calculated from (c) data.

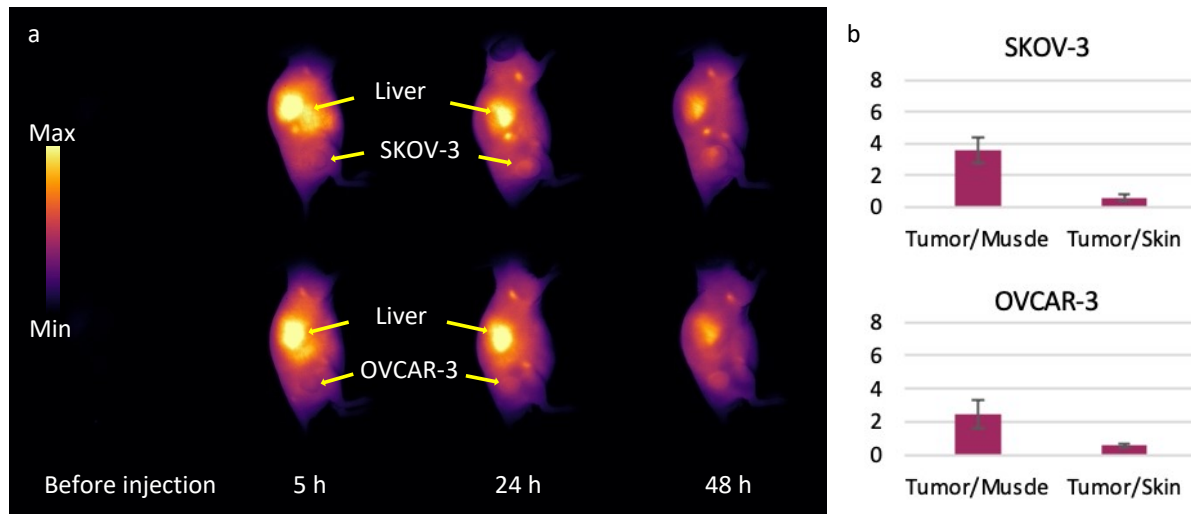

**Figure S3: SWIR-WAZABY-01 tumor type-dependent accumulation.** (a) *In vivo* NIR-II fluorescence imaging of mice bearing subcutaneous SKOV-3 and OVCAR-3 tumors before and 5, 24 and 48 h post intravenous administration of SWIR-WAZABY-01 (200  $\mu$ L at 600  $\mu$ M). Tumors and livers are indicated by yellow arrows. (b) *Ex-vivo* tumor/muscle and tumor/skin ratios calculated from excised organs at 48 h.

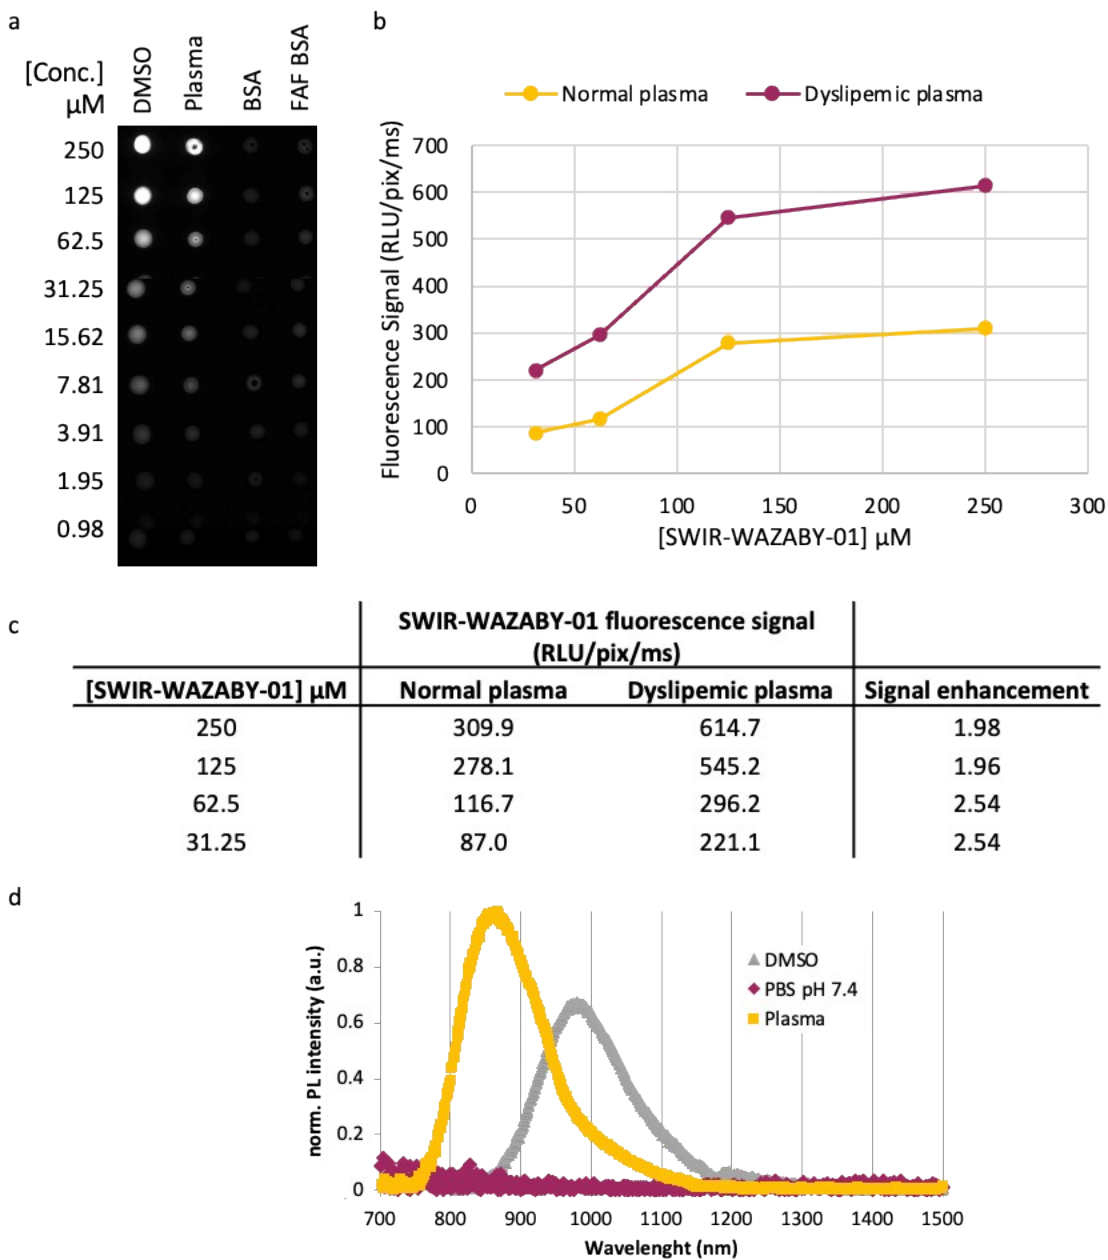

**Figure S4: SWIR-WAZABY-01 solvent-dependent fluorescence.** (a) Serial dilution of the SWIR-WAZABY-01 in DMSO, plasma, BSA 40 g/L, and fatty acid free (FAF)-BSA 40 g/L, showing that high fluorescence signals were observed in presence of DMSO and plasma ( $\lambda_{em} = 1,250$  nm). (b) Graphical representation and (c) quantification of the SWIR-WAZABY-01 fluorescence signal following serial dilution in normal and dyslipemic plasma (from Figure 2b). (d) Normalized photoluminescence intensity of SWIR-WAZABY-01 in DMSO (grey), PBS (purple), and plasma (yellow), recorded after excitation at  $\lambda_{ex} = 808$  nm.

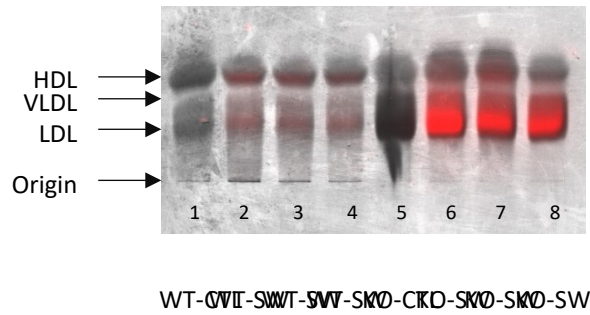

**Figure S5: Lipoprotein gel electrophoresis of mice plasmas.** Blood plasma of wild type (WT) and LDLR knockout (KO) mice was collected in control condition (CTL) or 30 min after i.v. administration of SWIR-WAZABY-01 (SW). Overlay of the SWIR-WAZABY-01 fluorescence image and black/white image of the lipoprotein electrophoresis gel. SWIR-WAZABY-01 fluorescence is designated by red color while the lipoprotein bands (LDL, VLDL, HDL) are detected in gray, thanks to Sudan Black staining. The electrophoresis indicated the absence of fluorescence for the control non-injected conditions, and a mild interaction of SW with lipoproteins of the WT mice. For KO animals, the fluorescence was strongly increased and a large part of the SW was colocalized with the LDL fraction.

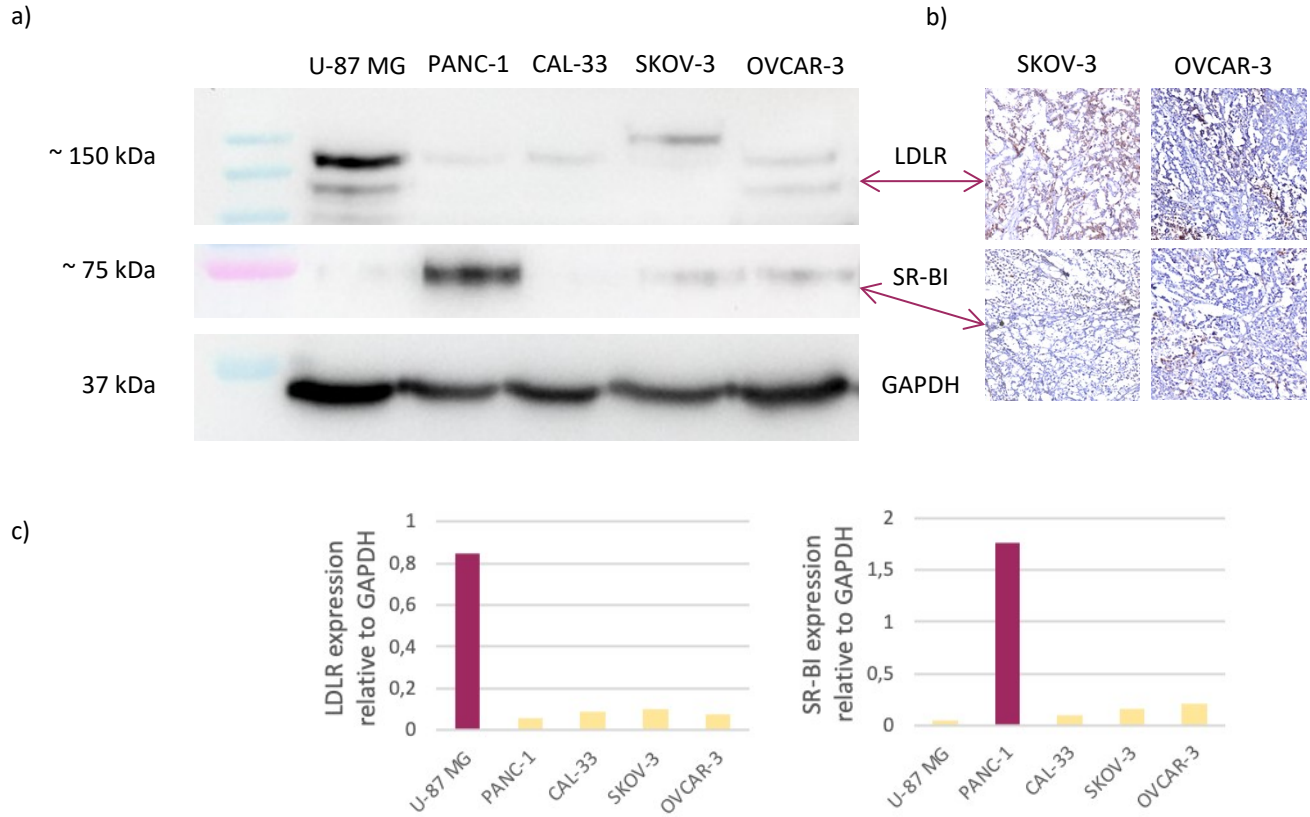

**Figure S6: Lipoprotein receptors expression profile in tumor cells (a) and resected tumors (b).** (a) Lipoprotein receptors (LDLR, SR-BI) expression in U-87 MG, PANC-1, CAL-33 cells, SKOV-3 and OVCAR-3 cells assessed by western blotting of whole cell extracts. GAPDH served as a loading control. (b) Histological sections of SKOV-3 and OVCAR-3 and their immunolabelling for LDLR and SB-BI. (c) Quantification of LDLR and SR-BI expression relative to GAPDH from (a) data.
